# Supplementary material for: A Low-Cost, Hands-on Module to Characterize Antimicrobial Compounds Using an Interdisciplinary, Biophysical Approach
Source: PLoS Biol. 2015 Jan 20;13(1):e1002044. doi: 10.1371/journal.pbio.1002044 (PMC4300086; doi:10.1371/journal.pbio.1002044)
Supplement: S2 Table — (DOCX) [file pbio.1002044.s006.docx]

**Table S2**

| **Time (min)** | **(mm)** |
| --- | --- |
| 0 | 18 |
| 0 | 20.25 |
| 0 | 20.25 |
| 45 | 15.5 |
| 45 | 16 |
| 45 | 16.25 |
| 90 | 11.6 |
| 90 | 13 |
| 90 | 15 |
| 135 | 11 |
| 135 | 10.75 |
| 135 | 11 |
| 210 | 10 |
| 210 | 10 |
| 210 | 10 |
| 300 | 6 |
| 300 | 6 |
| 300 | 6 |
